# Supplementary material
Source: PubMed Central journal article supplement (PMC3962238)

## SUPPLEMENTARY DATA

Figure S1. Daily mean temperature (°C) and daily cumulated precipitation (mm) plotted against time (Julian days) during the experiment, for each site. The solid black lines and the vertical bars represent respectively temperature and precipitation. Vertical broken lines indicate the litterbag harvest days (day/month).

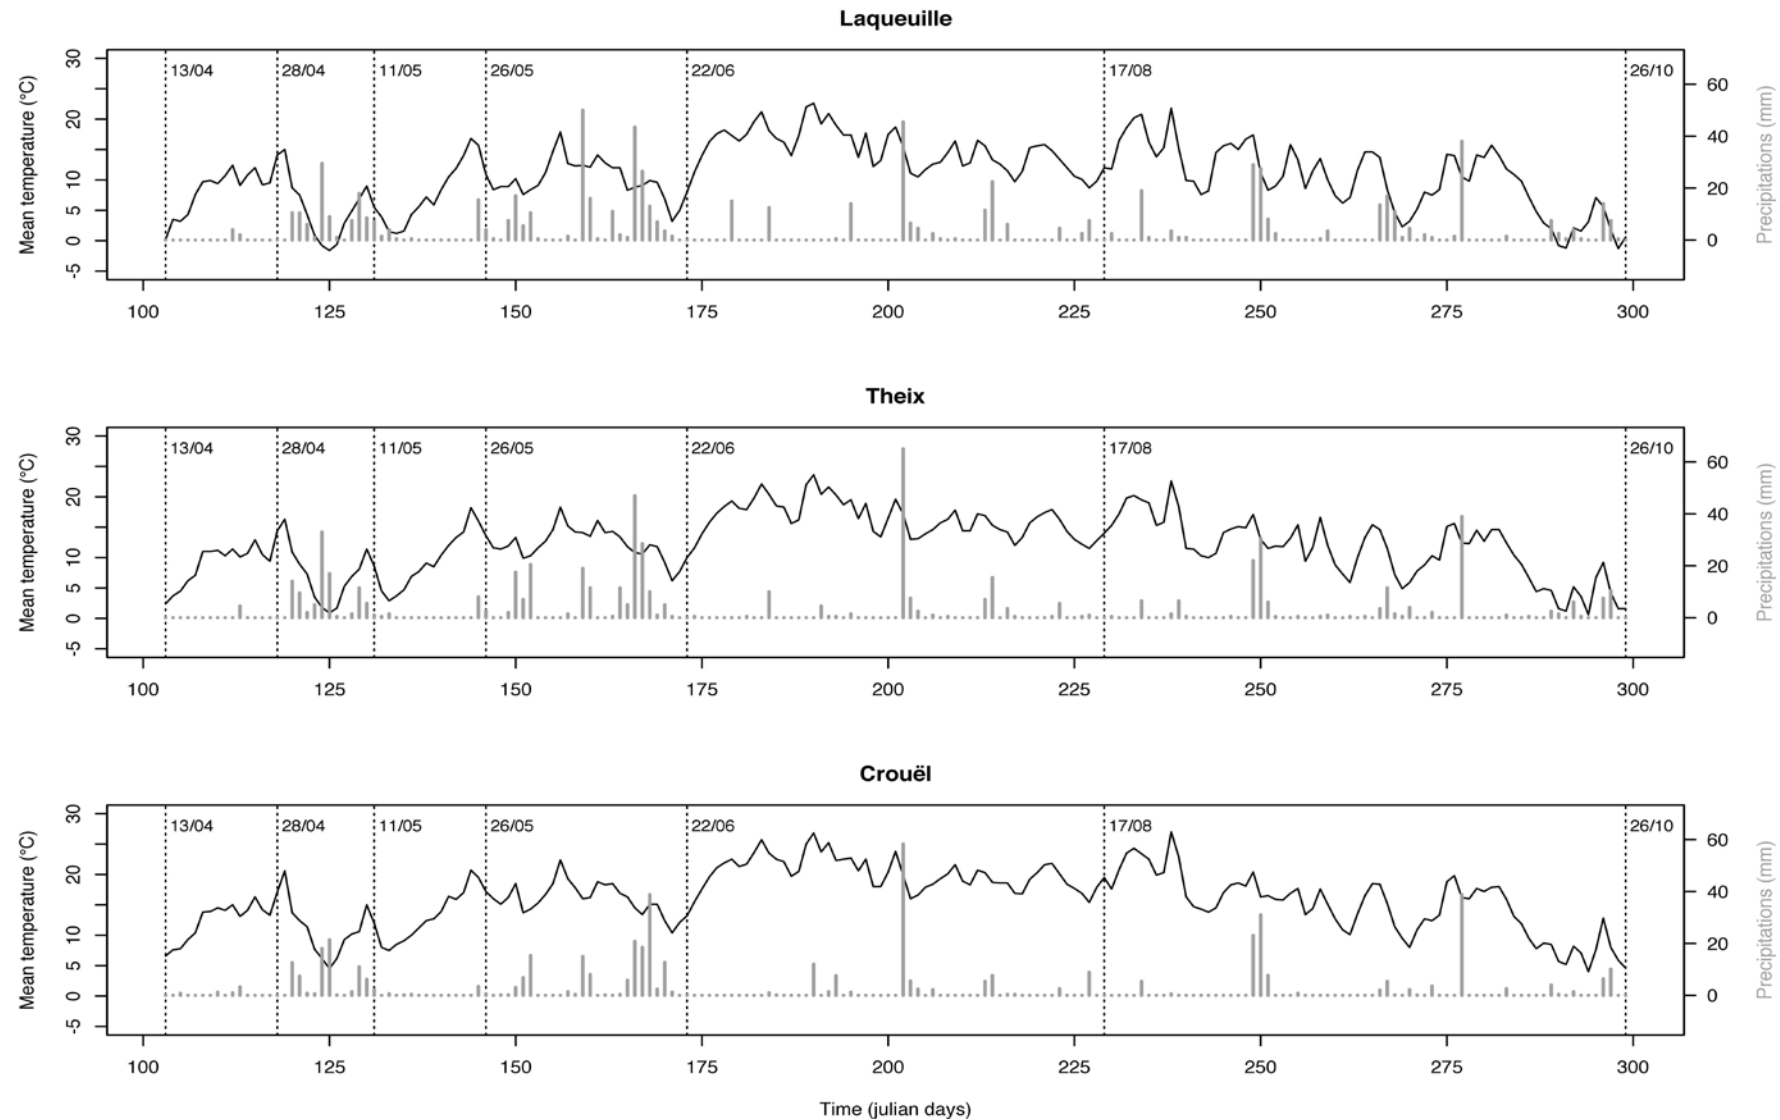

Supplement: supp_mct304_mct304supp.pdf [file supp_mct304_mct304supp.pdf]
